# Supplementary material
Source: Springer Nature journal article supplement (https://www.springermedizin.de/resource/supplementary/12985_2010_840_MOESM3_ESM.pdf/9609314)

**A.****GG**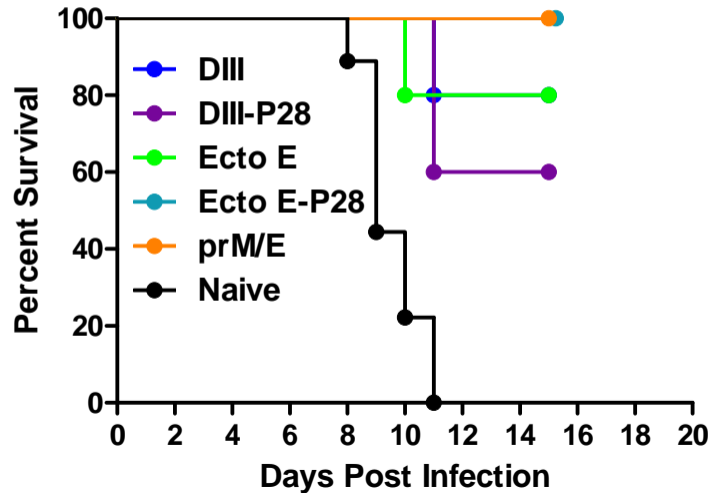**B.****IM**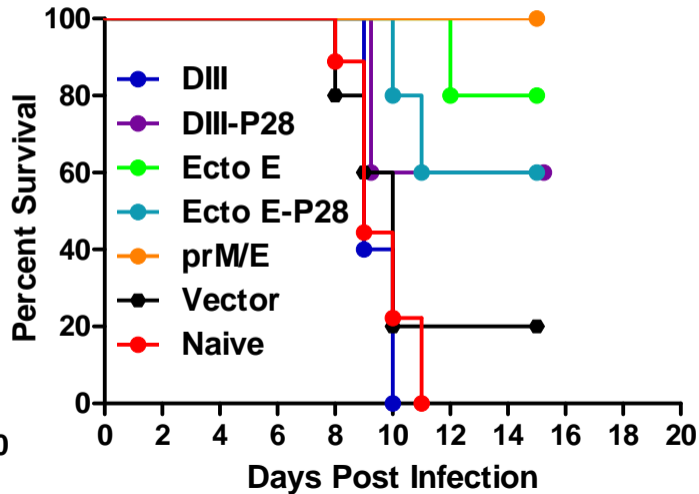

Supplement: MOESM3 [file 9609314]
